# Supplementary material for: Analyses of abdominal adiposity and metabolic syndrome as risk factors for respiratory distress in COVID-19
Source: PubMed Central journal article supplement (PMC7745457; doi:10.1136/bmjresp-2020-000792), 2020-12-16

## Supplemental data

**Figure S1.** Number of Metabolic Syndrome criteria and severity of COVID-19

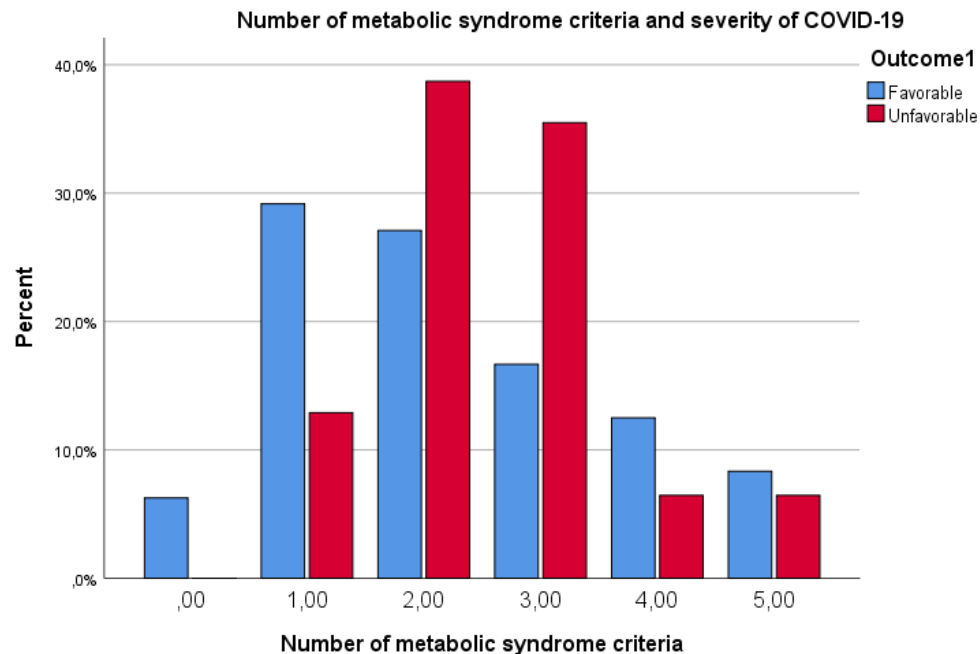

Criteria of Metabolic Syndrome: 1) Use of antihypertensives, 2) Triglycerides >1.7 mmol/L and/ or statin use, 3) HDL-C <1 mmol/L in male or <1.3mmol/L in female, 4) Hyperglycaemia  $\geq 7.8$  and/ or use of medication for glycemic control 5) Abdominal adiposity in male  $\geq 102$  cm or female  $\geq 88$ cm

**Table S1.** Multivariable post-adjusted logistic regression models, adjusted for age and gender

| Covariate                        | Multivariable post-adjusted logistic regression models. All variables are adjusted for age and gender |              |
|----------------------------------|-------------------------------------------------------------------------------------------------------|--------------|
|                                  | OR (95% CI)                                                                                           | P-value      |
| <b>Metabolic Syndrome</b>        | 1.64 (0.64-4.25)                                                                                      | 0.306        |
| <b>Use of antihypertensives*</b> | 0.42 (0.13-1.36)                                                                                      | 0.147        |
| <b>Hypertriglyceridemia*</b>     | 0.89 (0.34-2.35)                                                                                      | 0.809        |
| <b>Low HDL-C *</b>               | 2.46 (0.60-10.06)                                                                                     | 0.211        |
| <b>Hyperglycaemia*</b>           | 2.13 (0.77-5.94)                                                                                      | 0.148        |
| <b>Abdominal adiposity*</b>      | 5.19 (1.61-16.75)                                                                                     | <b>0.006</b> |
| <b>Waist-hip ratio</b>           | 1.13 (1.05-1.22)                                                                                      | <b>0.001</b> |
| <b>BMI</b>                       | 1.14 (1.04-1.25)                                                                                      | <b>0.006</b> |

OR: Odds Ratio, CI: Confidence Interval, BMI: body mass index, HDL-C: High Density Lipoprotein cholesterol. Cutoff values: High Triglycerides (>1.7 mmol/L), Low HDL-C (<1 mmol/L in male, <1.3mmol/L in female), Hyperglycaemia  $\geq 7.8$  mmol/L and/ or drug treatment for elevated blood glucose, Abdominal adiposity (male  $\geq 102$  cm, female  $\geq 88$ cm).

**Figure S2.** ROC-curve of multivariable post-adjusted regression analysis.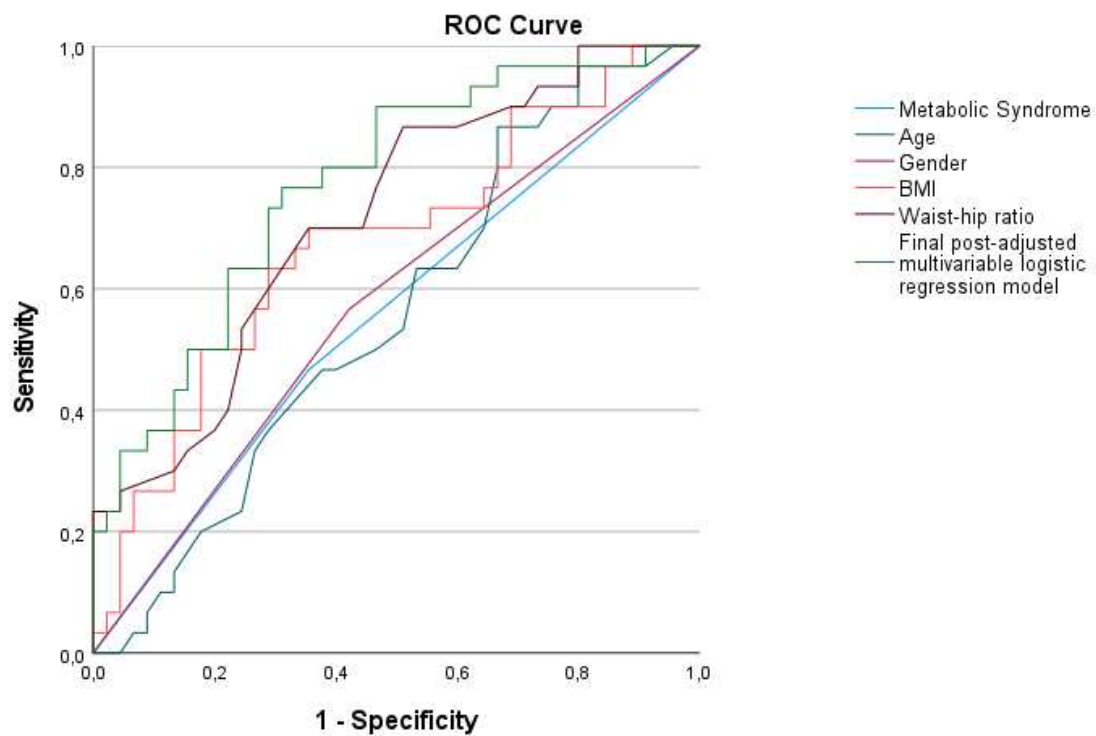

Supplement: bmjresp-2020-000792supp001.pdf [file bmjresp-2020-000792supp001.pdf]
